# Supplementary material
Source: PubMed Central journal article supplement (PMC7525038)

Patient:  
Patient ID:  
Diagnosis:

DOB:  
Exam. :  
Comment:

Sex: M

**OD**

IR 30° ART [HS]

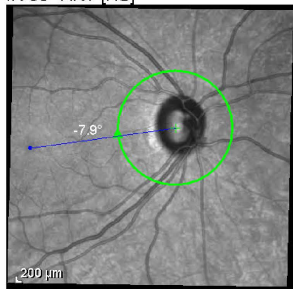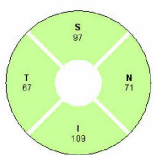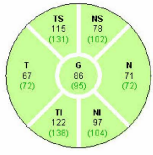

Asymmetry OD - OS

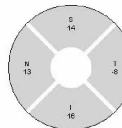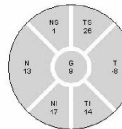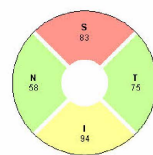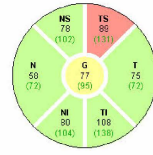

**OS**

IR 30° ART [HS]

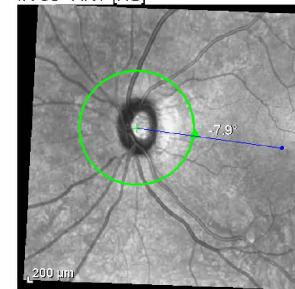

OCT ART (100) Q: 33 [HS]

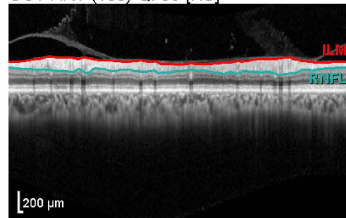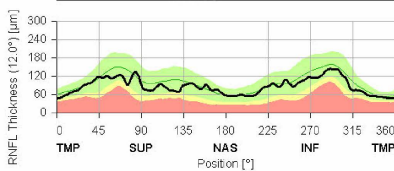

Classification OD

Within Normal Limits

Classification OS

Outside Normal Limits

OCT ART (100) Q: 32 [HS]

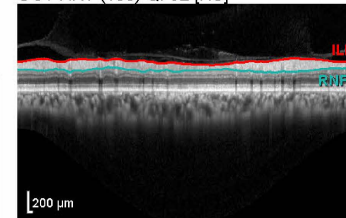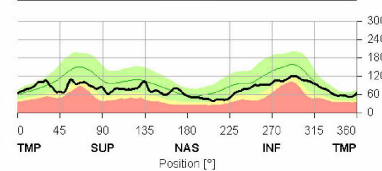

Within Normal Limits (p>0.05)

Borderline (p<0.05)

Outside Normal Limits (p<0.01)

Reference database: European Descent (2009) Warning: Classification results valid for Caucasian eyes only.

Software Version: 6.8.3

www.HeidelbergEngineering.com

RNFL Single Exam Report OU

**B**

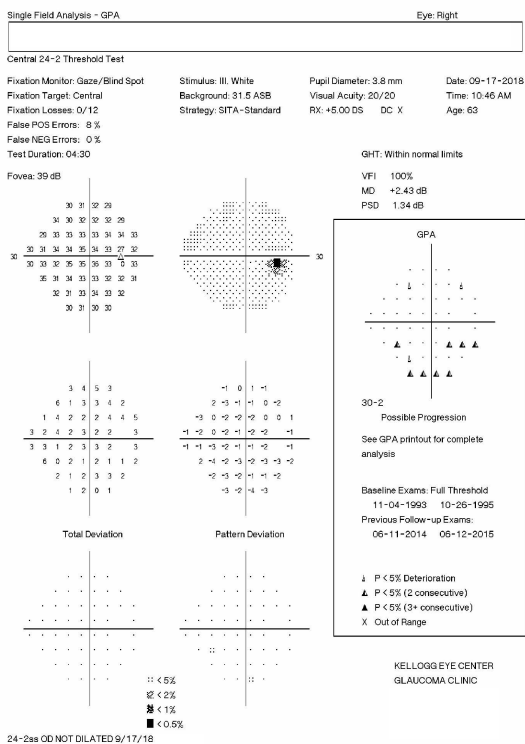

**C**

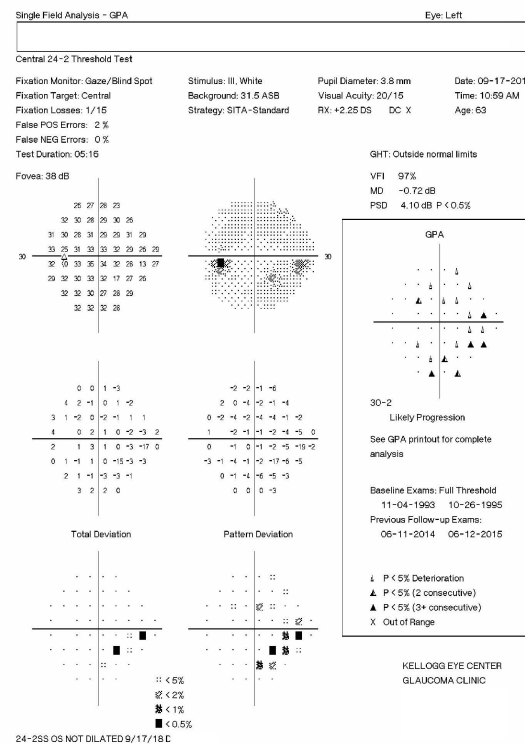

Supplement: NIHMS1593924-supplement-2.pdf [file NIHMS1593924-supplement-2.pdf]
