# Supplementary material
Source: PubMed Central journal article supplement (PMC7525038)
Supplement: NIHMS1593924-supplement-1.pdf [file NIHMS1593924-supplement-1.pdf]

Patient:  
Patient ID:  
Diagnosis:

DOB:  
Exam.:.  
Comment:

Sex: M

**OD**

**OS**

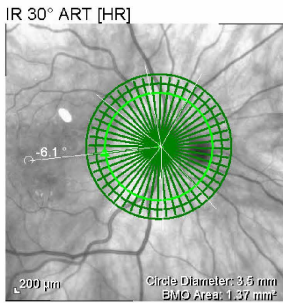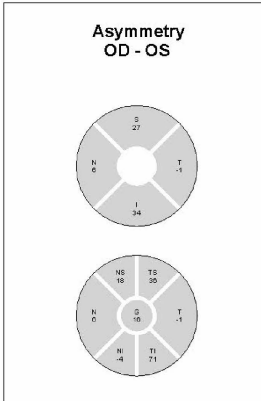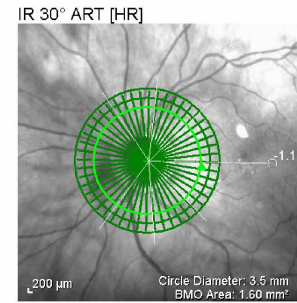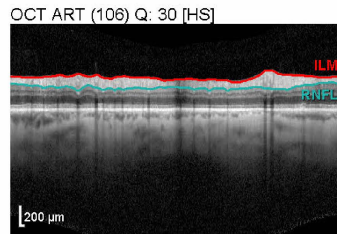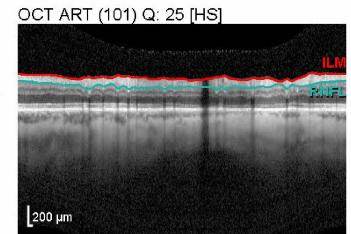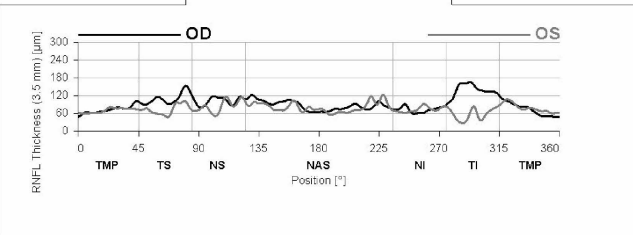

Classification OD: **Within Normal Limits**  
Classification OS: **Outside Normal Limits**

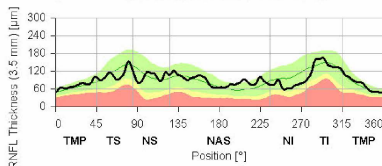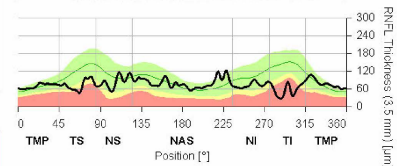

Within Normal Limits (p<0.05)    Borderline (p<0.05)    Outside Normal Limits (p<0.01)

Reference database: US Ethnic Mix (2016)

Software Version: 6.8.3

www.HeidelbergEngineering.com

RNFL Single Exam Report OU

**B**

**OD** Single Field Analysis    Central 24-2 Threshold Test

Fixation Monitor: Gaze/Blind Spot    Stimulus: Ill, White    Date: Jan 09, 2019  
Fixation Target: Central    Background: 31.5 asb    Time: 10:12 AM  
Fixation Losses: 0/14    Strategy: SITA Standard    Age: 73  
False POS Errors: 2%    Pupil Diameter: 3.8 mm \*  
False NEG Errors: 0%    Visual Acuity: 20/25  
Test Duration: 06:46    Rx: +0.00 DS  
Fovea: 36 dB

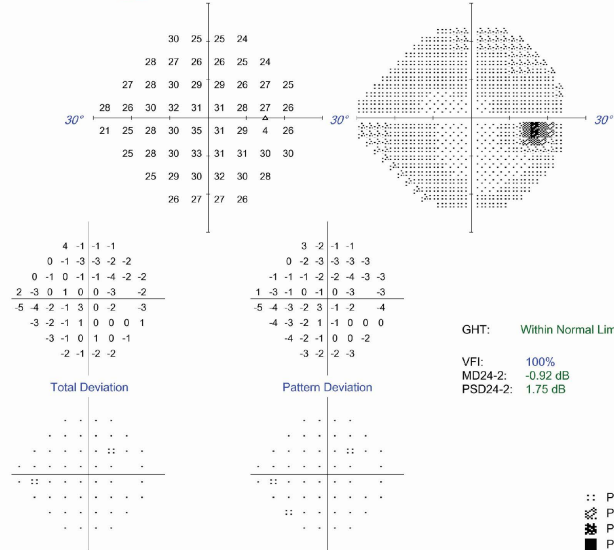

**C**

**OS** Single Field Analysis    Central 24-2 Threshold Test

Fixation Monitor: Gaze/Blind Spot    Stimulus: Ill, White    Date: Jan 09, 2019  
Fixation Target: Central    Background: 31.5 asb    Time: 9:56 AM  
Fixation Losses: 1/18    Strategy: SITA Standard    Age: 73  
False POS Errors: 0%    Pupil Diameter: 3.8 mm \*  
False NEG Errors: 0%    Visual Acuity: 20/25  
Test Duration: 10:37    Rx: +0.00 DS  
Fovea: 35 dB

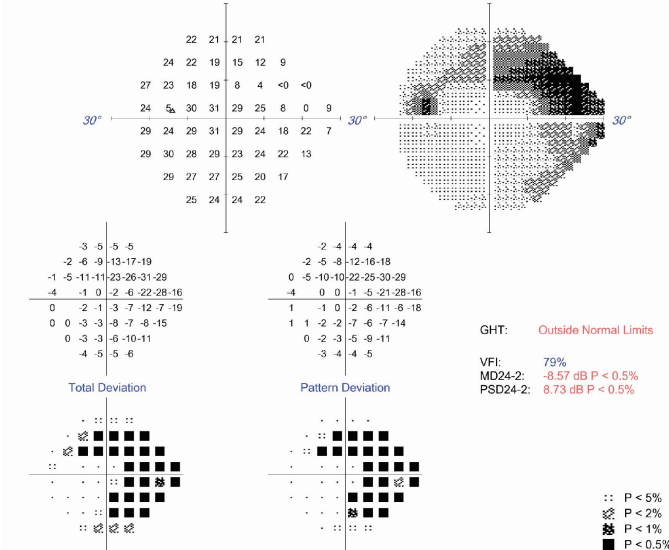

:: P < 5%  
⊗ P < 2%  
⊗ P < 1%  
■ P < 0.5%

:: P < 5%  
⊗ P < 2%  
⊗ P < 1%  
■ P < 0.5%
